# Supplementary material
Source: PubMed Central journal article supplement (PMC8380686)

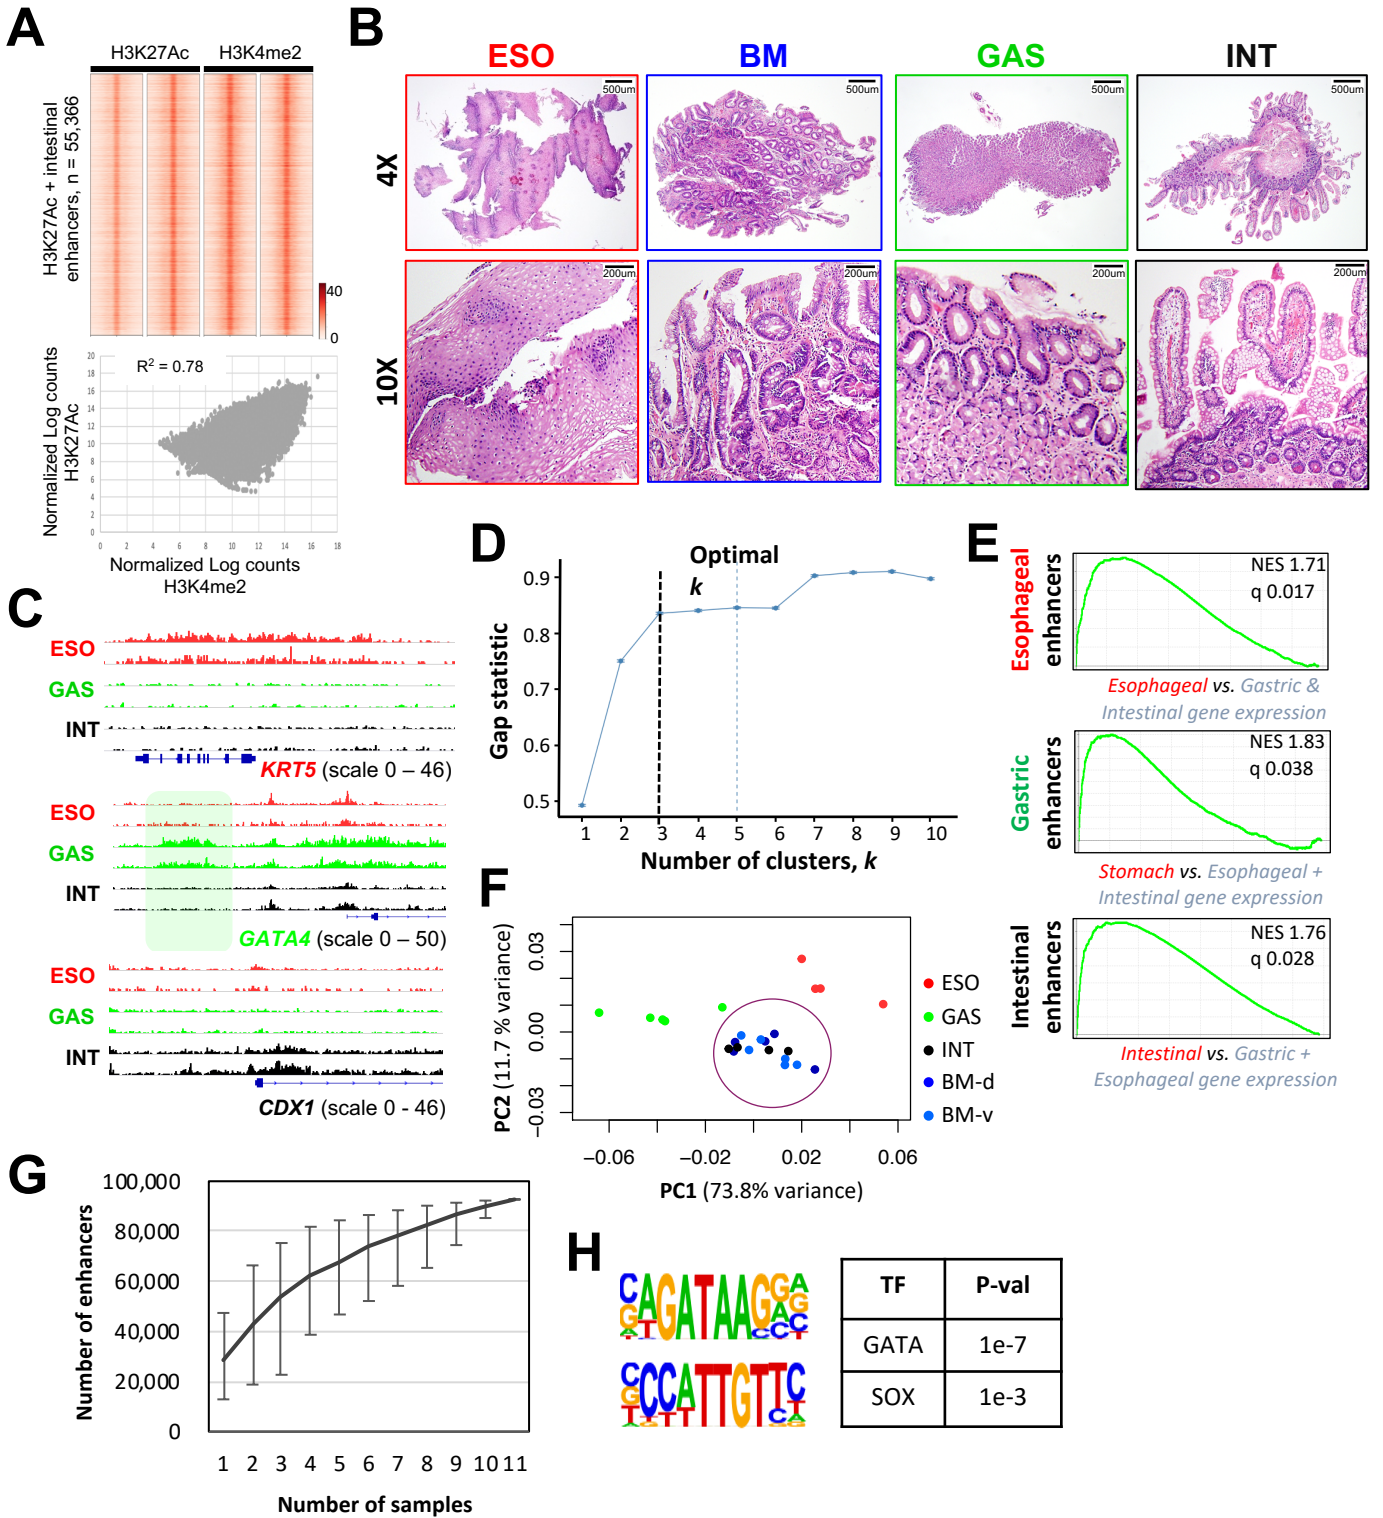

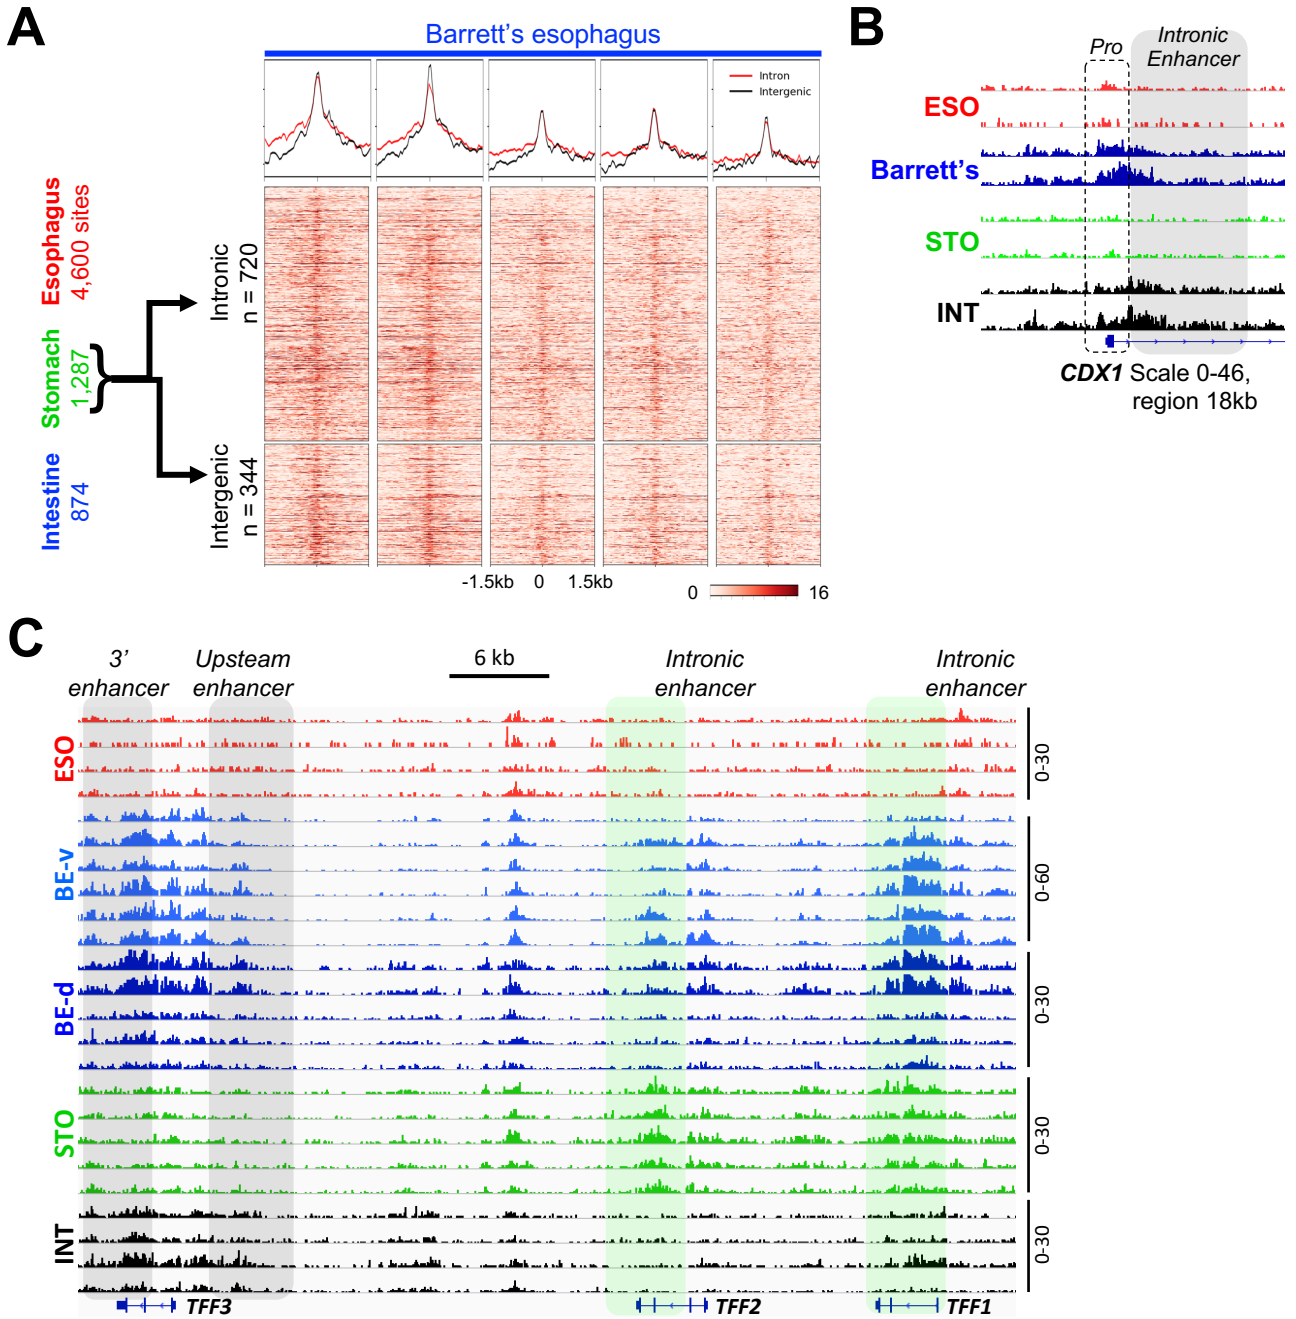

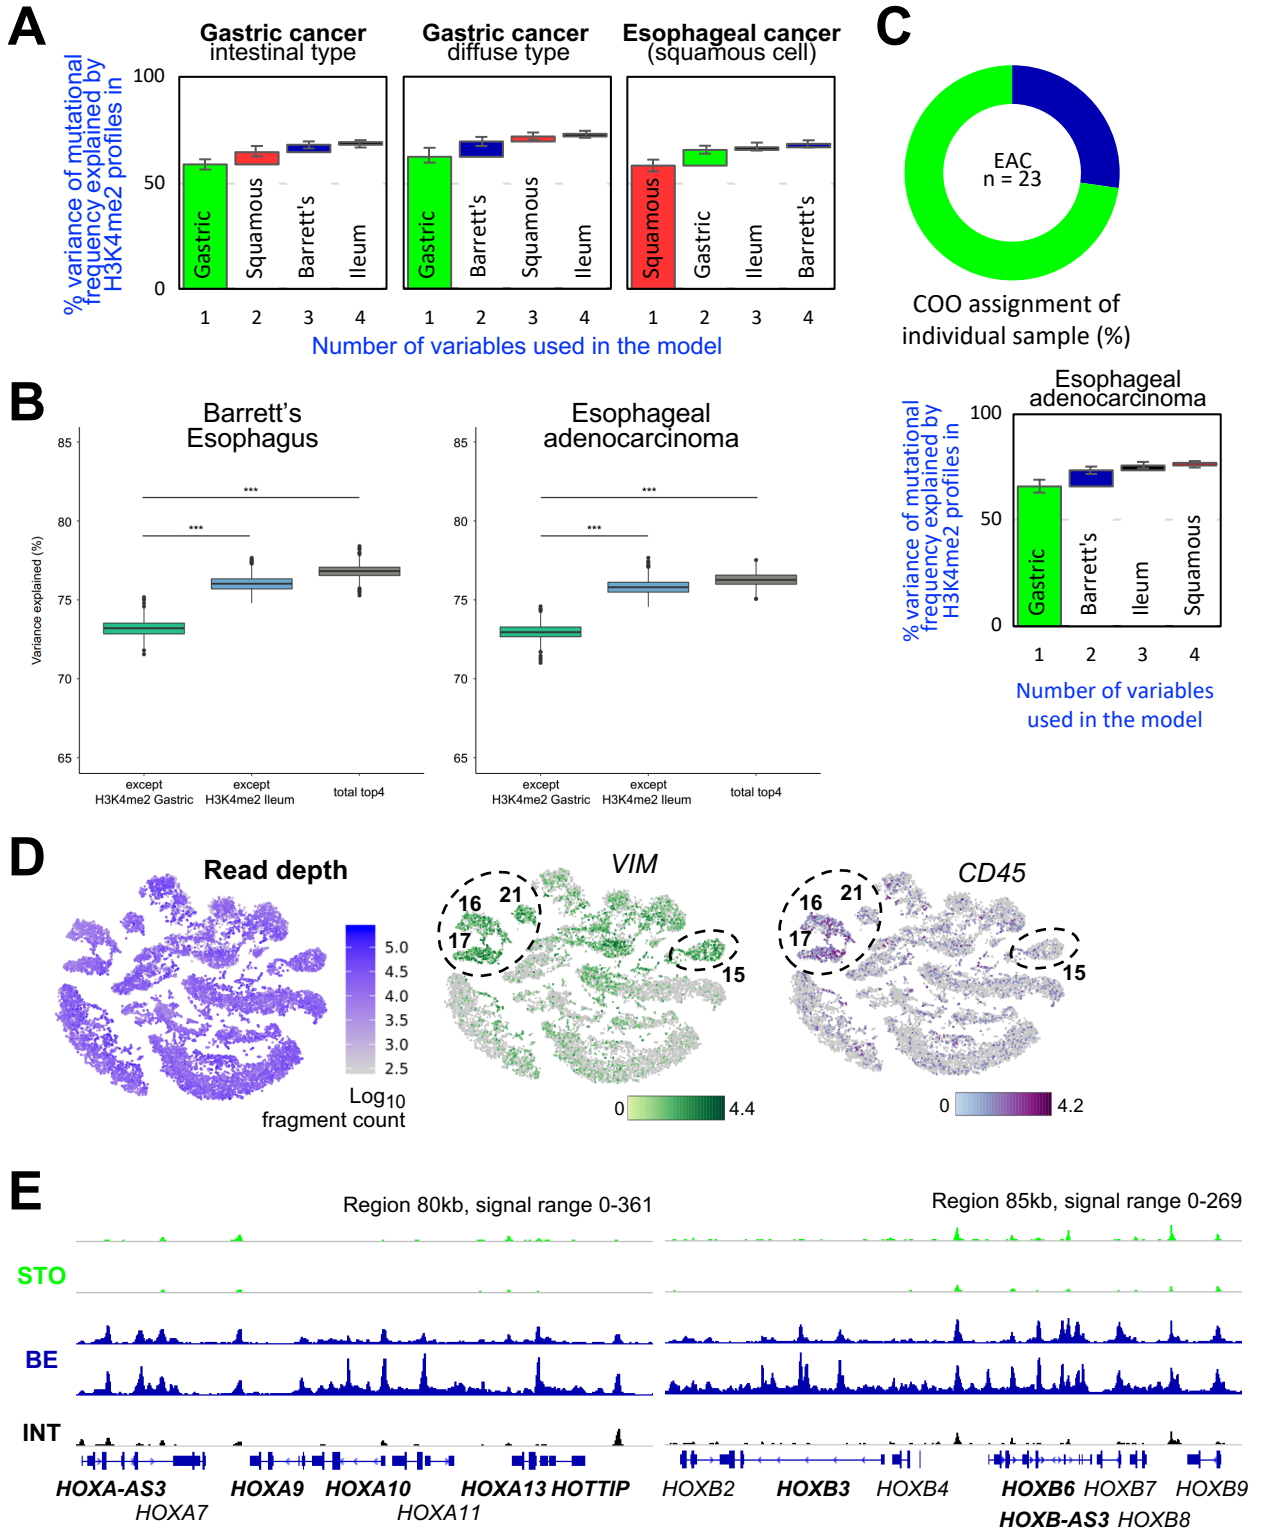

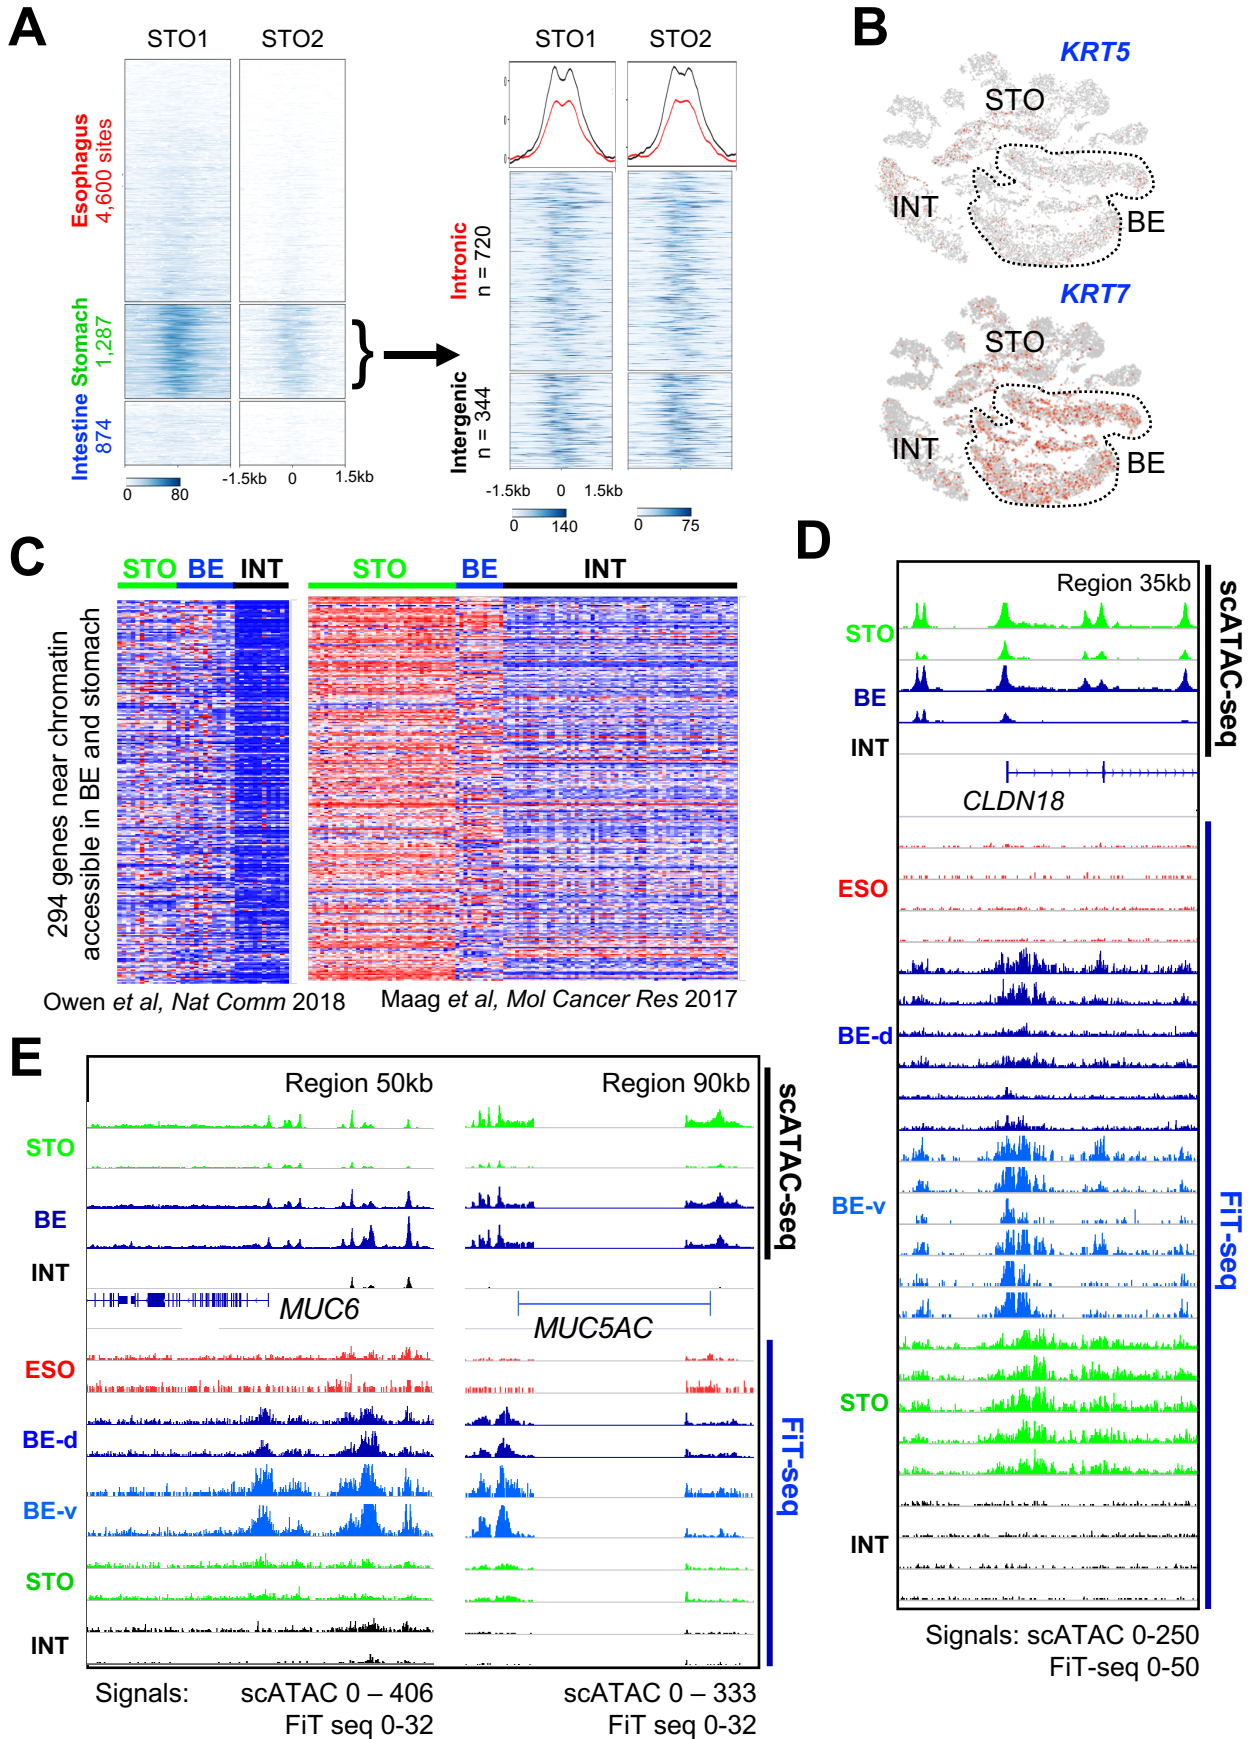





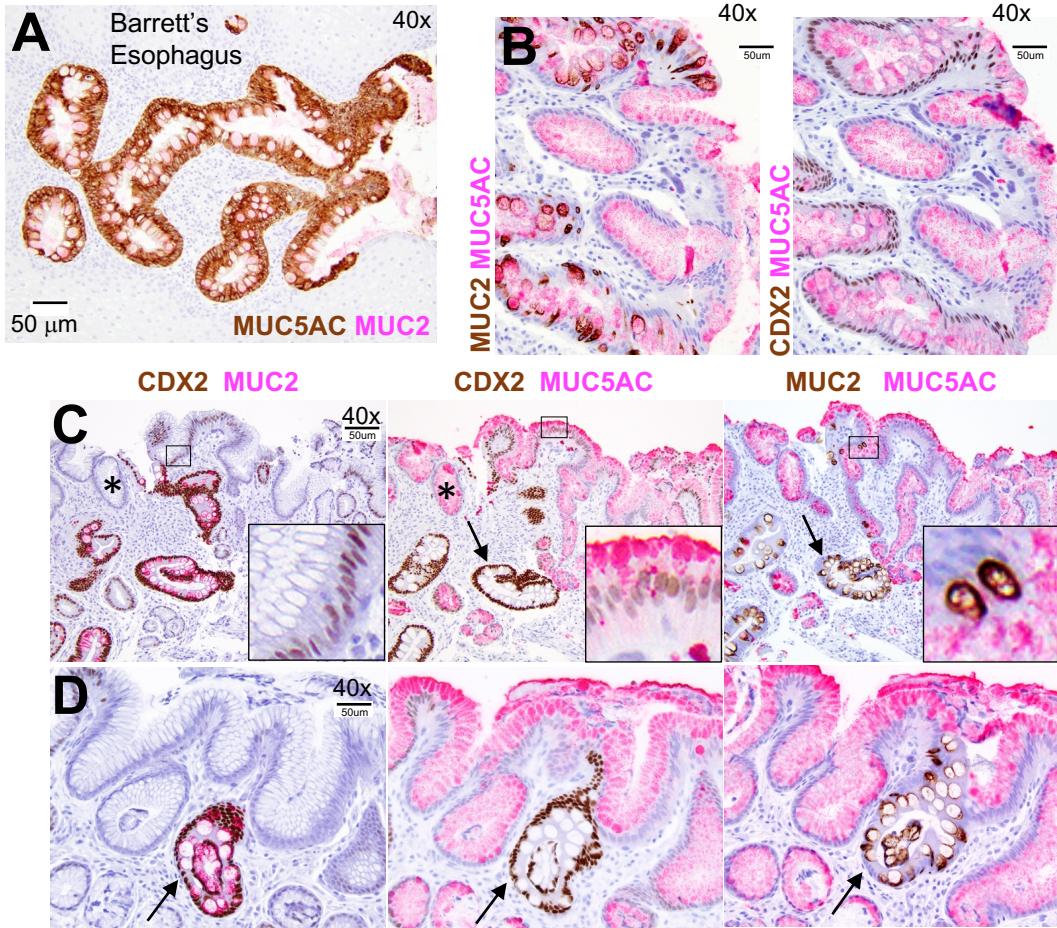

Supplement: NIHMS1711023-supplement-2.pdf [file NIHMS1711023-supplement-2.pdf]
